# Supplementary material
Source: Springer Nature journal article supplement (https://www.springermedizin.de/resource/supplementary/13075_2013_4367_MOESM3_ESM.pdf/9696054)

Morphine - Knee Bend

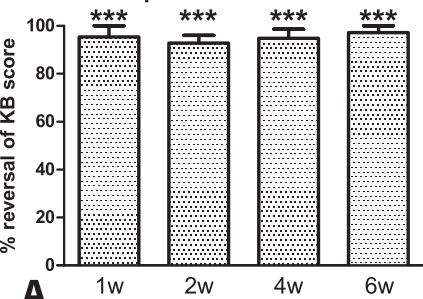

Morphine - CatWalk

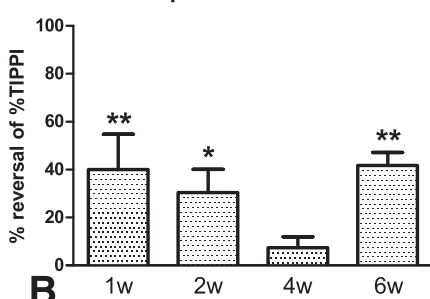

Lidocaine - Knee Bend

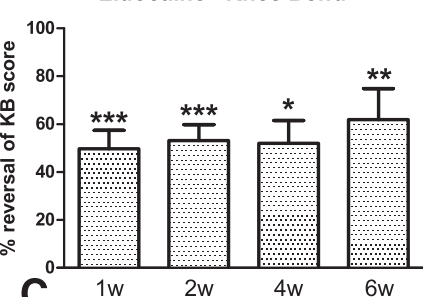

Lidocaine - CatWalk

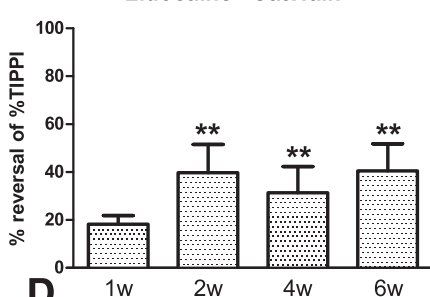

Diclofenac - Knee Bend

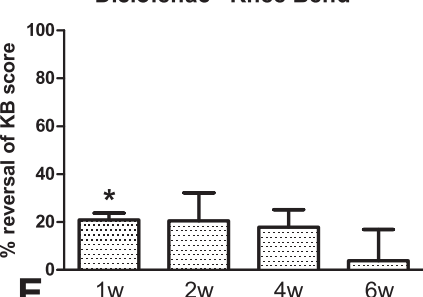

Diclofenac - CatWalk

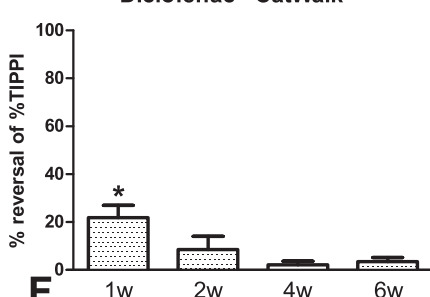

Supplement: MOESM3 [file 9696054]
